# Supplementary material
Source: PubMed Central journal article supplement (PMC4330457)
Supplement: 395_2014_439_MOESM1_ESM.pdf [file 395_2014_439_MOESM1_ESM.pdf]

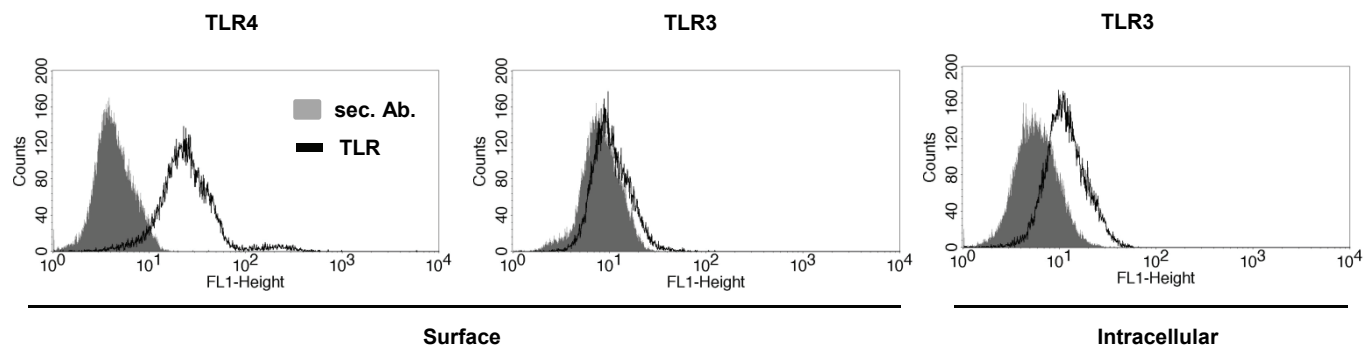

**Figure S1: FACS analysis for TLR localization in HUVEC.** Exemplary data from non-permeabilized (surface) and permeabilized (intracellular) cells stained with secondary antibody only (sec. Ab., grey area) or with antibodies against TLR3&4 as indicated.

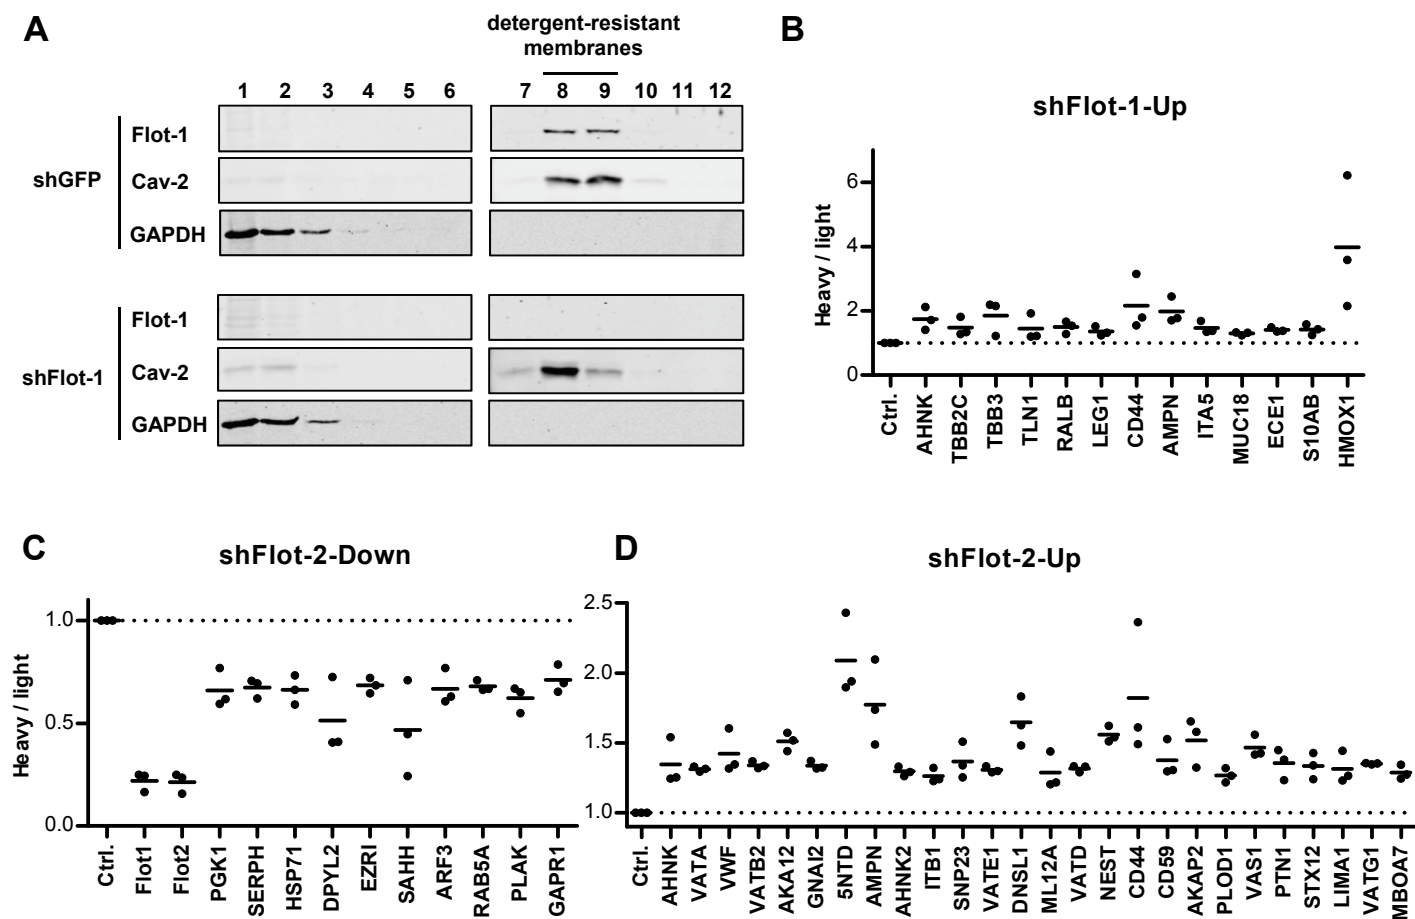

**Figure S2: Impact of down-regulation of flotillins on the detergent resistant membrane fraction of HUVECs (A)** Exemplary Western blot of density fractionation for detergent-resistant membranes probed for the proteins indicated in HUVECs transduced with shGFP and shFlot-1. Numbers above the blots indicate the fraction collected after sucrose gradient ultra-centrifugation where 1 illustrates 40% and 12 reflects the 5% sucrose fraction. Fractions 8 and 9 were pooled and subjected to proteome analysis. **(B-D)** Subset of SILAC-mass spectrometric analyses on the effect of shFlot-1 and shFlot-2 on protein abundance in the detergent-resistant membrane fraction of HUVECs. Depicted are proteins increased >20% **(B&D)** or decreased <20% **(C)** by the shRNA indicated. N=3.

**Table S1: Flotillin-1 SILAC LTQ-Orbitrap-MS:** List of proteins significantly up-regulated (>20%) by shFlot-1 relative to shGFP in the detergent-resistant membrane of HUVECs (n=3).

| Protein |                                                     | Accession | Score | Mean heavy / light | SEM  |
|---------|-----------------------------------------------------|-----------|-------|--------------------|------|
| AHNK    | Neuroblast differentiation-associated protein AHNAK | Q09666    | 3698  | 1.75               | 0.21 |
| TBB2C   | Tubulin beta-2C chain                               | P68371    | 1364  | 1.48               | 0.17 |
| TBB3    | Tubulin beta-3 chain                                | Q13509    | 1343  | 1.85               | 0.32 |
| TLN1    | Talin-1                                             | Q9Y490    | 789   | 1.45               | 0.24 |
| RALB    | Ras-related protein Ral-B                           | P11234    | 604   | 1.49               | 0.11 |
| LEG1    | Galectin-1                                          | P09382    | 602   | 1.36               | 0.08 |
| CD44    | Isoform Reticulocyte of CD44 antigen                | P16070-12 | 520   | 2.16               | 0.50 |
| AMPN    | Aminopeptidase N                                    | P15144    | 451   | 1.98               | 0.24 |
| ITA5    | Integrin alpha-5                                    | P08648    | 404   | 1.47               | 0.11 |
| MUC18   | Cell surface glycoprotein MUC18                     | P43121    | 288   | 1.30               | 0.03 |
| ECE1    | Isoform C of Endothelin-converting enzyme 1         | P42892-3  | 193   | 1.41               | 0.04 |
| S10AB   | Protein S100-A11                                    | P31949    | 168   | 1.42               | 0.09 |
| HMOX1   | Heme oxygenase 1                                    | P09601    | 151   | 3.98               | 1.19 |

**Table S2: Flotillin-2 SILAC LTQ-Orbitrap-MS:** List of proteins significantly down-regulated (>20%) by shFlot-2 relative to shGFP in the detergent-resistant membrane of HUVECs (n=3).

| Protein |                                                       | Accession | Score | Mean Heavy / light | SEM  |
|---------|-------------------------------------------------------|-----------|-------|--------------------|------|
| Flot1   | Flotillin-1                                           | O75955    | 1469  | 0.22               | 0.03 |
| Flot2   | Flotillin-2                                           | Q14254    | 1260  | 0.21               | 0.03 |
| PGK1    | Phosphoglycerate kinase 1                             | P00558    | 759   | 0.66               | 0.05 |
| SERPH   | Serpin H1                                             | P50454    | 650   | 0.67               | 0.03 |
| HSP71   | Heat shock 70                                         | P08107    | 592   | 0.66               | 0.04 |
| DPYL2   | Dihydropyrimidinase-related protein 2                 | Q16555    | 370   | 0.51               | 0.11 |
| EZR1    | Ezrin                                                 | P15311    | 363   | 0.68               | 0.03 |
| SAHH    | Adenosylhomocysteinase                                | P23526    | 237   | 0.47               | 0.14 |
| ARF3    | ADP-ribosylation factor 3                             | P61204    | 213   | 0.67               | 0.05 |
| RAB5A   | Ras-related protein Rab-5A                            | P20339    | 204   | 0.68               | 0.02 |
| PLAK    | Junction plakoglobin                                  | P14923    | 182   | 0.62               | 0.04 |
| GAPR1   | Golgi-associated plant pathogenesis-related protein 1 | Q9H4G4    | 164   | 0.63               | 0.03 |

**Table S3: Flotillin-2 SILAC LTQ-Orbitrap-MS:** List of proteins significantly up-regulated (>20%) by shFlot-2 relative to shGFP in the detergent-resistant membrane of HUVECs (n=3).

| Protein |                                                         | Accession | Score | Mean Heavy / light | SEM  |
|---------|---------------------------------------------------------|-----------|-------|--------------------|------|
| AHNK    | Neuroblast differentiation-associated protein AHNAK     | Q09666    | 4382  | 1.35               | 0.10 |
| VATA    | V-type proton ATPase catalytic subunit A                | P38606    | 2326  | 1.31               | 0.01 |
| VWF     | von Willebrand factor                                   | P04275    | 1636  | 1.42               | 0.09 |
| VATB2   | V-type proton ATPase subunit B, brain isoform           | P21281    | 1502  | 1.34               | 0.01 |
| AKA12   | Isoform Gamma of A-kinase anchor protein 12             | Q02952-3  | 1454  | 1.51               | 0.04 |
| GNAI2   | Guanine nucleotide-binding protein G(i) subunit alpha-2 | P04899    | 1247  | 1.31               | 0.03 |
| 5NTD    | 5'-nucleotidase                                         | P21589    | 740   | 2.09               | 0.17 |
| AMPN    | Aminopeptidase N                                        | P15144    | 708   | 1.77               | 0.18 |
| AHNK2   | Isoform 3 of Protein AHNAK2                             | Q8IVF2-3  | 655   | 1.30               | 0.02 |
| ITB1    | Isoform Beta-1B of Integrin beta-1                      | P05556-2  | 638   | 1.26               | 0.03 |
| SNP23   | Synaptosomal-associated protein 23                      | O00161    | 782   | 1.37               | 0.08 |
| VATE1   | V-type proton ATPase subunit E 1                        | P36543    | 504   | 1.31               | 0.01 |
| DNSL1   | Deoxyribonuclease-1-like 1                              | P49184    | 488   | 1.65               | 0.10 |
| ML12A   | Myosin regulatory light chain 12A                       | P19105    | 430   | 1.29               | 0.08 |
| VATD    | V-type proton ATPase subunit D                          | Q9Y5K8    | 408   | 1.32               | 0.01 |
| NEST    | Nestin                                                  | P48681    | 349   | 1.62               | 0.06 |
| CD44    | Isoform Reticulocyte of CD44 antigen                    | P16070-12 | 331   | 1.82               | 0.27 |
| CD59    | CD59 glycoprotein                                       | P13987    | 314   | 1.38               | 0.08 |
| AKAP2   | A-kinase anchor protein 2                               | Q9Y2D5    | 307   | 1.52               | 0.10 |
| PLOD1   | Procollagen-lysine,2-oxoglutarate 5-dioxygenase 1       | Q02809    | 287   | 1.27               | 0.03 |
| VAS1    | V-type proton ATPase subunit S1                         | Q15904    | 210   | 1.47               | 0.05 |
| PTN1    | Tyrosine-protein phosphatase non-receptor type 1        | P18031    | 198   | 1.35               | 0.06 |
| STX12   | Syntaxin-12                                             | Q86Y82    | 185   | 1.34               | 0.05 |
| LIMA1   | Isoform 3 of LIM domain and actin-binding protein 1     | Q9UHB6-3  | 183   | 1.31               | 0.07 |
| VATG1   | V-type proton ATPase subunit G 1                        | O75348    | 180   | 1.35               | 0.00 |
| MBOA7   | Isoform 3 of Lysophospholipid acyltransferase 7         | Q96N66-3  | 156   | 1.29               | 0.03 |

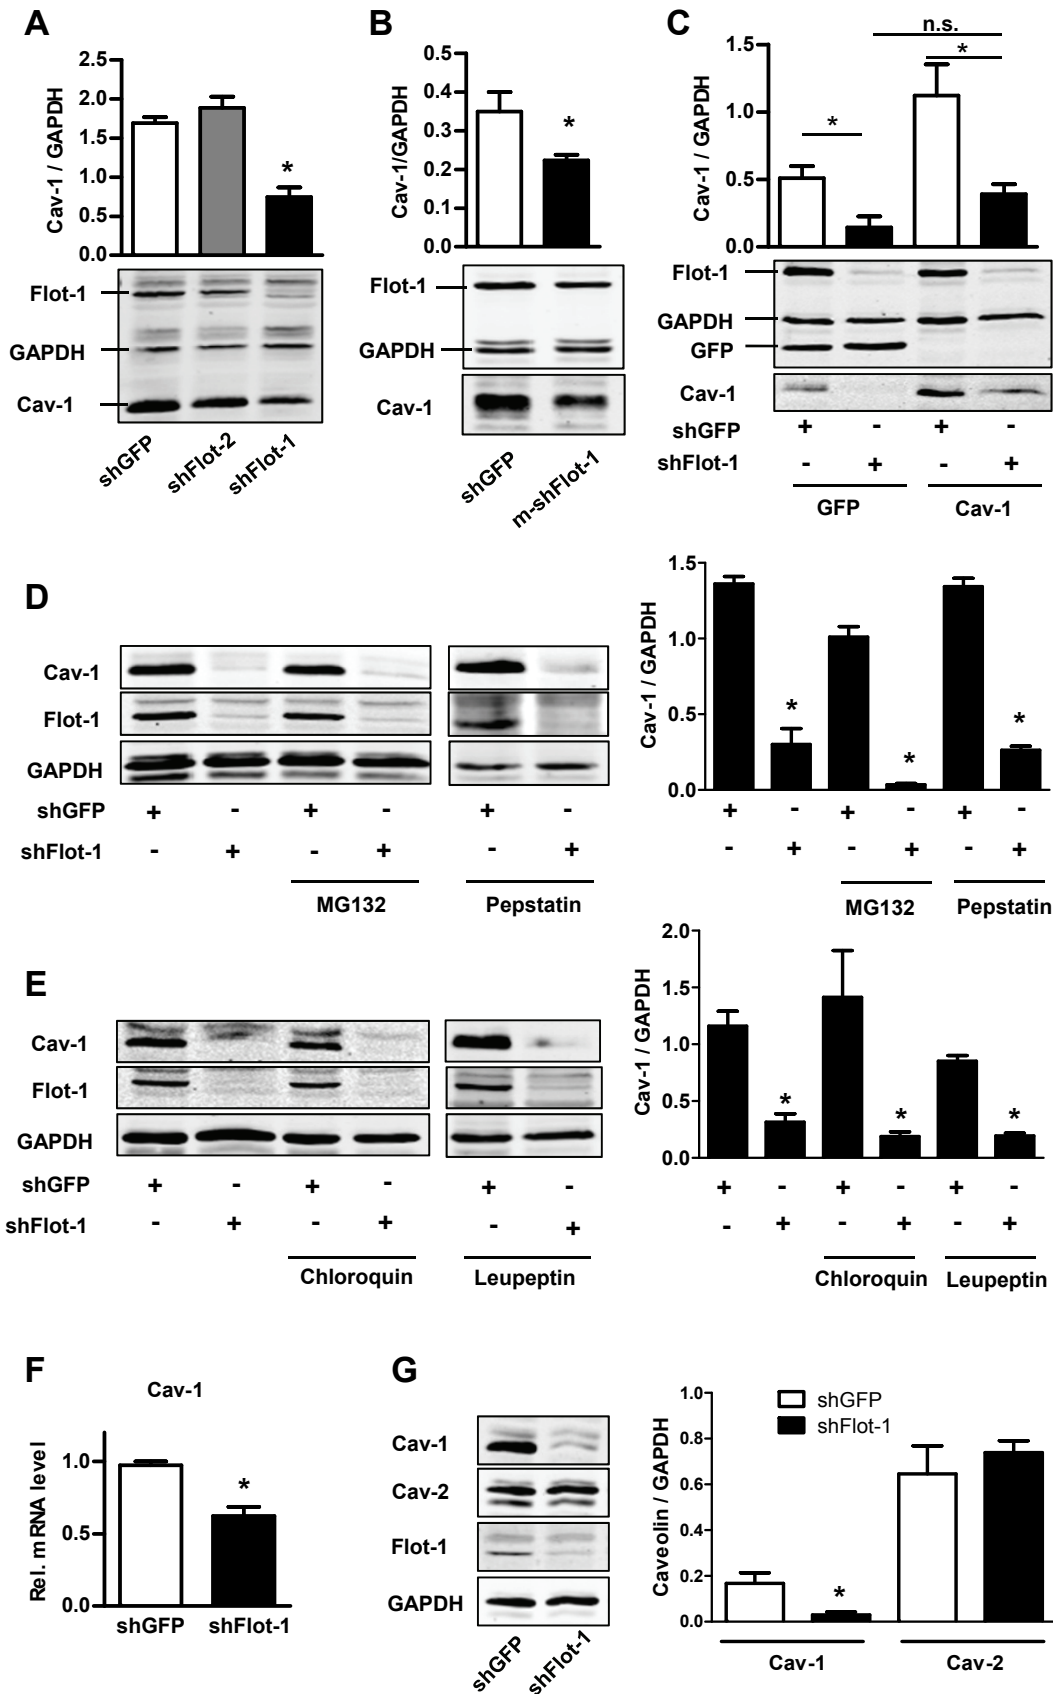

**Figure S3: Analysis of the interaction of flotillin-1 and caveolin-1.** (A-E, G) Western blot and densitometry for the proteins indicated in HUVECs (A,C-G) and in mouse lung endothelial cells (B) transduced with shGFP, shFlot-2, shFlot-1 or mouse(m)-shFlot-1 and in (C) electroporated with plasmids coding for GFP (pcDNA3) or cav-1 (pCMV6-XL5). Cav-1: Caveolin-1, Flot-1: flotillin-1 in the presence or absence of MG132 (10  $\mu\text{mol/l}$ , 5.5 h), pepstatin (2  $\mu\text{mol/l}$ , 22 h), chloroquin (100  $\mu\text{mol/l}$ , 25 h), leupeptin (30  $\mu\text{mol/l}$ , 24 h). N=3, \* $p < 0.05$ , n.s.=not significant. (F) qRT-PCR for caveolin-1 relative to RNA polymerase II in HUVECs transduced with shGFP or shFlot-1. N=3, \* $p < 0.05$  n.s.=not significant.

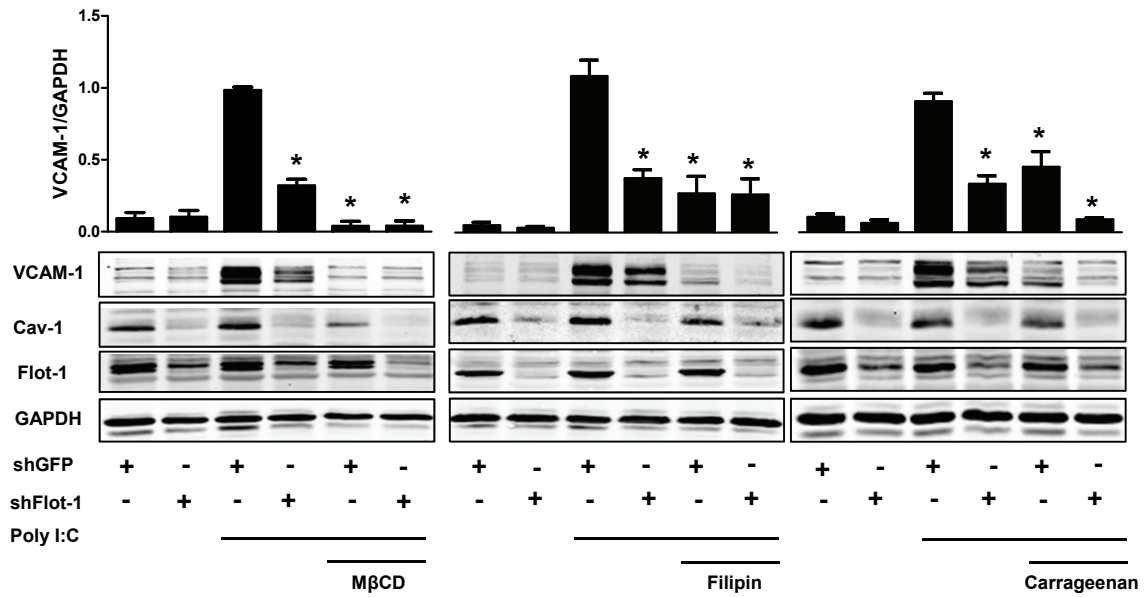

**Figure S4: Effect of cholesterol-modulating compounds on poly-I:C-induced signaling.** Exemplary Western blots and densitometry for the proteins indicated in HUVECs transduced with shGFP or shFlot-1 with and without stimulation with poly-I:C (10  $\mu$ g/ml, 180 min) in the presence or absence of methyl- $\beta$ -cyclodextrin (M $\beta$ CD, 5 mmol/l, 60 min pretreatment), filipin (5  $\mu$ g/ml, 30 min pretreatment) and Carrageenan (250  $\mu$ g/ml, 60 min pretreatment). N=3, \*p<0.05.
